# Supplementary material for: The In Vitro and In Vivo Synergistic Antimicrobial Activity Assessment of Vacuum Microwave Assisted Aqueous Extracts from Pomegranate and Avocado Fruit Peels and Avocado Seeds Based on a Mixtures Design Model
Source: MDPI journal article supplement (doi:10.3390/plants10091757), 2021-08-24
Supplement: s1 [file s1]

**Table S1.** Nutrition Declaration per 100g of the foods used in the food models.

|               | <b>Minced beef meat</b> | <b>Cheese salad dressing</b> | <b>Greek Yogurt</b> |
|---------------|-------------------------|------------------------------|---------------------|
| Energy        | 1,387kJ /332kcal        | 842kJ /201kcal               | 536kJ /129kcal      |
| Total Fat     | 30g                     | 16.1g                        | 10g                 |
| Saturated Fat | 11.9g                   | 4.9g                         | 7.5g                |
| Carbohydrates | 0g                      | 4g                           | 3.5g                |
| Sugars        | 0g                      | 2.5g                         | 3.5g                |
| Proteins      | 14g                     | 9.1g                         | 5.5g                |
| Salt          | 67mg                    | 2g                           | 110mg               |
